# Supplementary material for: Fasting induces a biphasic adaptive metabolic response in murine small intestine
Source: Springer Nature journal article supplement (doi:10.1186/1471-2164-8-361), 2007-10-09
Supplement: Additional file 2 [file 1471-2164-8-361-s2.pdf]

**Supplementary table 1:** Gene-specific primer sequences, product lengths, annealing temperatures, and MgCl<sub>2</sub> concentrations.

| <b>gene</b>   | <b>primer sequence (5'→3')</b> | <b>product length<br/>(bp)</b> | <b>temp<br/>(°C)</b> | <b>MgCl<sub>2</sub><br/>(mM)</b> |
|---------------|--------------------------------|--------------------------------|----------------------|----------------------------------|
| <b>18S</b>    | F: TTCGGAAGCTGAGGCCATGAT       | 132                            | 58                   | 3                                |
|               | R: CGAACCTCCGACTTTCGTTCT       |                                |                      |                                  |
| <b>Casp6</b>  | F: GTGTTTCGATCCAGCCGAG         | 309                            | 55                   | 3                                |
|               | R: GCGTTCGTATGCGTAAAC          |                                |                      |                                  |
| <b>Ccng 2</b> | F: GCTAGCTTTGCATGCACCT         | 230                            | 60                   | 3                                |
|               | R: GCTCCATCACACACAGAA          |                                |                      |                                  |
| <b>Gs</b>     | F: CCACCTCAGCAAGTTCCC          | 318                            | 55                   | 3                                |
|               | R: GGCTCCGGTTATACTTG           |                                |                      |                                  |
| <b>Pck1</b>   | F: GCCAAGCTCACGCCCATC          | 329                            | 58                   | 3                                |
|               | R: CTCACGATTGTGCCGCTAT         |                                |                      |                                  |
| <b>Pdk4</b>   | F: GGGGGTGAAGTGGTAGATTT        | 191                            | 58                   | 3                                |
|               | R: GCACCTTAGCTCTAGGTCA         |                                |                      |                                  |
| <b>H2-Ab1</b> | F: GATCAAAGTGCCTGGTT           | 229                            | 55                   | 2                                |
|               | R: GCCGCTCAACATCTTGCT          |                                |                      |                                  |
| <b>Rxra</b>   | F: GCACGTACACCGGAACA           | 217                            | 53                   | 3                                |
|               | R: CGCTTCTAGTGACGCATA          |                                |                      |                                  |
| <b>UbC</b>    | F: CATCACCTTGGACGTCGA          | 171                            | 60                   | 3                                |
|               | R: AATGAAACTTGTTAACAGC         |                                |                      |                                  |

PCR primers were chosen at the 3' end of the molecule and spanned, when possible, exon-intron boundaries to avoid amplification of genomic DNA. 18S rRNA was used for normalization. Tested genes were: caspase 6 (*Casp6*), cyclin G2 (*Ccng2*), glutamine synthetase (*Gs*), phosphoenolpyruvate carboxykinase 1 (*Pck1*), pyruvate dehydrogenase kinase 4 (*Pdk4*), major histocompatibility group class II A-β1 (*H2-Ab1*), retinoid-X receptor α (*Rxra*), ubiquitin C (*UbC*).

**Supplementary table 2:** Selection of genes with an expression pattern unique for a certain phase of fasting.

| <i>gene name</i>                 | <i>description</i>                                    | <i>fold change</i> |            |            |
|----------------------------------|-------------------------------------------------------|--------------------|------------|------------|
|                                  |                                                       | <i>12h</i>         | <i>24h</i> | <i>72h</i> |
| <b><i>short-term fasting</i></b> |                                                       |                    |            |            |
| <i>Car1</i>                      | carbonic anhydrase 1                                  | 4.2                |            |            |
| <i>Acadvl</i>                    | acyl-Coenzyme A dehydrogenase, very long chain        | 2.3                |            |            |
| <i>Fabp4</i>                     | fatty acid binding protein 4                          | 2.2                |            |            |
| <i>Slc34a2</i>                   | solute carrier family 34 (sodium phosphate), member 2 | 5.4                | 1.9        |            |
| <i>Des</i>                       | desmin                                                | 3.0                | 3.9        |            |
| <i>Gpx3</i>                      | glutathione peroxidase 3                              | 2.3                | 1.7        |            |
| <i>Ogdh</i>                      | oxoglutarate dehydrogenase (lipoamide)                | 2.1                | 1.8        |            |
| <i>Ppara</i>                     | peroxisome proliferator activated receptor alpha      | 1.4                | 2.2        |            |
| <i>Cubn</i>                      | cubilin (intrinsic factor-cobalamin receptor)         | -3.0               |            |            |
| <i>Gclm</i>                      | glutamate-cysteine ligase, modifier subunit           | -2.7               |            |            |
| <b><i>prolonged fasting</i></b>  |                                                       |                    |            |            |
| <i>Ikbkg</i>                     | inhibitor of kappaB kinase gamma                      |                    |            | 10.0       |
| <i>Creb3</i>                     | cAMP responsive element binding protein 3             |                    |            | 6.0        |
| <i>Timp2</i>                     | tissue inhibitor of metalloproteinase 2               |                    |            | 5.9        |
| <i>Rxra</i>                      | retinoid X receptor alpha                             |                    |            | 5.5        |
| <i>Pcdh18</i>                    | protocadherin 18                                      |                    |            | 5.5        |
| <i>Jak3</i>                      | Janus kinase 3                                        |                    |            | 4.6        |
| <i>Lipc</i>                      | lipase, hepatic                                       |                    |            | 4.4        |
| <i>Cdkn1a</i>                    | cyclin-dependent kinase inhibitor 1A (P21)            |                    |            | 3.1        |
| <i>Dncl1</i>                     | dynein, cytoplasmic, light chain 1                    |                    |            | -4.6       |
| <i>Tnxb</i>                      | tenascin XB                                           |                    |            | -3.7       |

Shown are fold changes (increase represented by positive and decrease by negative numbers) of genes specifically up- or downregulated in short (12 and 24h) and prolonged fasting (72h), which could be used as biomarker collection.

**Supplementary table 3:** PPAR $\alpha$  target genes are differentially expressed in fasted intestine.

| <i>gene symbol</i> | <i>gene name</i>                                                             | <b>12h</b><br>( <i>Ppara</i> $\uparrow$ ) | <b>24h</b><br>( <i>Ppara</i> $\uparrow$ ) | <b>72h</b><br>( <i>Ppara</i> $\emptyset$ ) |
|--------------------|------------------------------------------------------------------------------|-------------------------------------------|-------------------------------------------|--------------------------------------------|
| <i>Crot</i>        | carnitine O-octanoyltransferase                                              | -1.8                                      | -1.7                                      | -1.8                                       |
| <i>Cpt2</i>        | carnitine palmitoyltransferase 2                                             | /                                         | /                                         | -3.3                                       |
| <i>Acadvl</i>      | acyl-Coenzyme A dehydrogenase, very long chain                               | 2.3                                       | /                                         | /                                          |
| <i>Acadl</i>       | acyl-Coenzyme A dehydrogenase, long-chain                                    | /                                         | /                                         | -1.8                                       |
| <i>Scd1</i>        | stearoyl-Coenzyme A desaturase 1                                             | 1.9                                       | 1.9                                       | /                                          |
| <i>Dci</i>         | dodecanoyl-Coenzyme A delta isomerase (3,2 trans-enoyl-Coenzyme A isomerase) | 1.4                                       | /                                         | -1.6                                       |
| <i>Mod1</i>        | malic enzyme, supernatant                                                    | -1.8                                      | -1.5                                      | -1.9                                       |
| <i>Hmgcs2</i>      | 3-hydroxy-3-methylglutaryl-Coenzyme A synthase 2                             | 3.8                                       | 2.2                                       | 2.6                                        |
| <i>Fabp4</i>       | fatty acid binding protein 4, adipocyte                                      | 2.2                                       | /                                         | /                                          |
| <i>Fabp5</i>       | fatty acid binding protein 5, epidermal                                      | -1.6                                      | /                                         | -1.8                                       |
| <i>Gpd1</i>        | glycerol-3-phosphate dehydrogenase 1 (soluble)                               | /                                         | /                                         | -2.5                                       |
| <i>Gyk</i>         | glycerol kinase                                                              | /                                         | -1.9                                      | -1.7                                       |
| <i>Cte1</i>        | cytosolic acyl-CoA thioesterase 1                                            | 2.9                                       | 1.6                                       | /                                          |
| <i>Cd36</i>        | CD36 antigen                                                                 | /                                         | /                                         | 2.1                                        |
| <i>Mgll</i>        | monoglyceride lipase                                                         | /                                         | 1.5                                       | /                                          |
| <i>Pdk4</i>        | pyruvate dehydrogenase kinase, isoenzyme 4                                   | 2.5                                       | 2.4                                       | 7.3                                        |

The regulation of PPAR $\alpha$  target genes (shown here as a fold change) coincides with a change in *Ppara* expression, depicted by symbols indicating its upregulation at 12 and 24h (1.4 and 2.2 fold respectively), and no change in expression at 72 hours of fasting.
